## Supplementary information

| Species name                              | Three-character code | Species name (continued)          | Code |
|-------------------------------------------|----------------------|-----------------------------------|------|
| <i>Acyrtosiphon pisum</i>                 | Api                  | <i>Homo sapiens</i>               | Hsa  |
| <i>Aeropyrum pernix</i>                   | Ape                  | <i>Methanobrevibacter smithii</i> | Msm  |
| <i>Anabaena variabilis</i>                | Ava                  | <i>Methanosarcina acetivorans</i> | Mac  |
| <i>Anopheles gambiae</i>                  | Aga                  | <i>Monodelphis domestica</i>      | Mdo  |
| <i>Apis mellifera</i>                     | Ame                  | <i>Monosiga brevicollis</i>       | Mbr  |
| <i>Arabidopsis thaliana</i>               | Ath                  | <i>Mus musculus</i>               | Mmu  |
| <i>Atta cephalotes</i>                    | Ace                  | <i>Mycoplasma genitalium</i>      | Mge  |
| <i>Bacillus subtilis</i>                  | Bsu                  | <i>Naegleria gruberi</i>          | Ngr  |
| <i>Bigelowiella natans</i>                | Bna                  | <i>Nematostella vectensis</i>     | Nve  |
| <i>Bombyx mori</i>                        | Bmo                  | <i>Ornithorhynchus anatinus</i>   | Oan  |
| <i>Branchiostoma floridae</i>             | Bfl                  | <i>Oryza sativa</i>               | Osa  |
| <i>Buchnera aphidicola</i>                | Bap                  | <i>Pediculus humanus</i>          | Phu  |
| <i>Caenorhabditis elegans</i>             | Cel                  | <i>Phaeodactylum tricornutum</i>  | Ptr  |
| <i>Candidatus Korarchaeum cryptofilum</i> | Cko                  | <i>Physcomitrella patens</i>      | Ppa  |
| <i>Capitella teleta</i>                   | Cte                  | <i>Pirellula staleyi</i>          | Pst  |
| <i>Chlamydomonas reinhardtii</i>          | Cre                  | <i>Plasmodium falciparum</i>      | Pfa  |
| <i>Ciona intestinalis</i>                 | Cin                  | <i>Pyrococcus abyssi</i>          | Pab  |
| <i>Cryptococcus neoformans</i>            | Cne                  | <i>Saccharomyces cerevisiae</i>   | Scs  |
| <i>Culex quinquefasciatus</i>             | Cqu                  | <i>Schistosoma japonicum</i>      | Sja  |
| <i>Danaus plexippus</i>                   | Dpl                  | <i>Schizosaccharomyces pombe</i>  | Spo  |
| <i>Deinococcus radiodurans</i>            | Dra                  | <i>Sulfolobus solfataricus</i>    | Sso  |
| <i>Dictyostelium discoideum</i>           | Ddi                  | <i>Tribolium castaneum</i>        | Tca  |
| <i>Drosophila melanogaster</i>            | Dme                  | <i>Trichoplax adhaerens</i>       | Tad  |
| <i>Drosophila simulans</i>                | Dsi                  |                                   |      |
| <i>Emiliana huxleyi</i>                   | Ehu                  |                                   |      |
| <i>Escherichia coli</i>                   | Eco                  |                                   |      |
| <i>Geodermatophilus obscurus</i>          | Gob                  |                                   |      |
| <i>Glossina morsitans</i>                 | Gmo                  |                                   |      |
| <i>Guillardia theta</i>                   | Gth                  |                                   |      |
| <i>Haloferax volcanii</i>                 | Hvo                  |                                   |      |

**Supplementary Table 1.** Species names in alphabetical order and their corresponding three-character code as used in Figure 1 and 4.

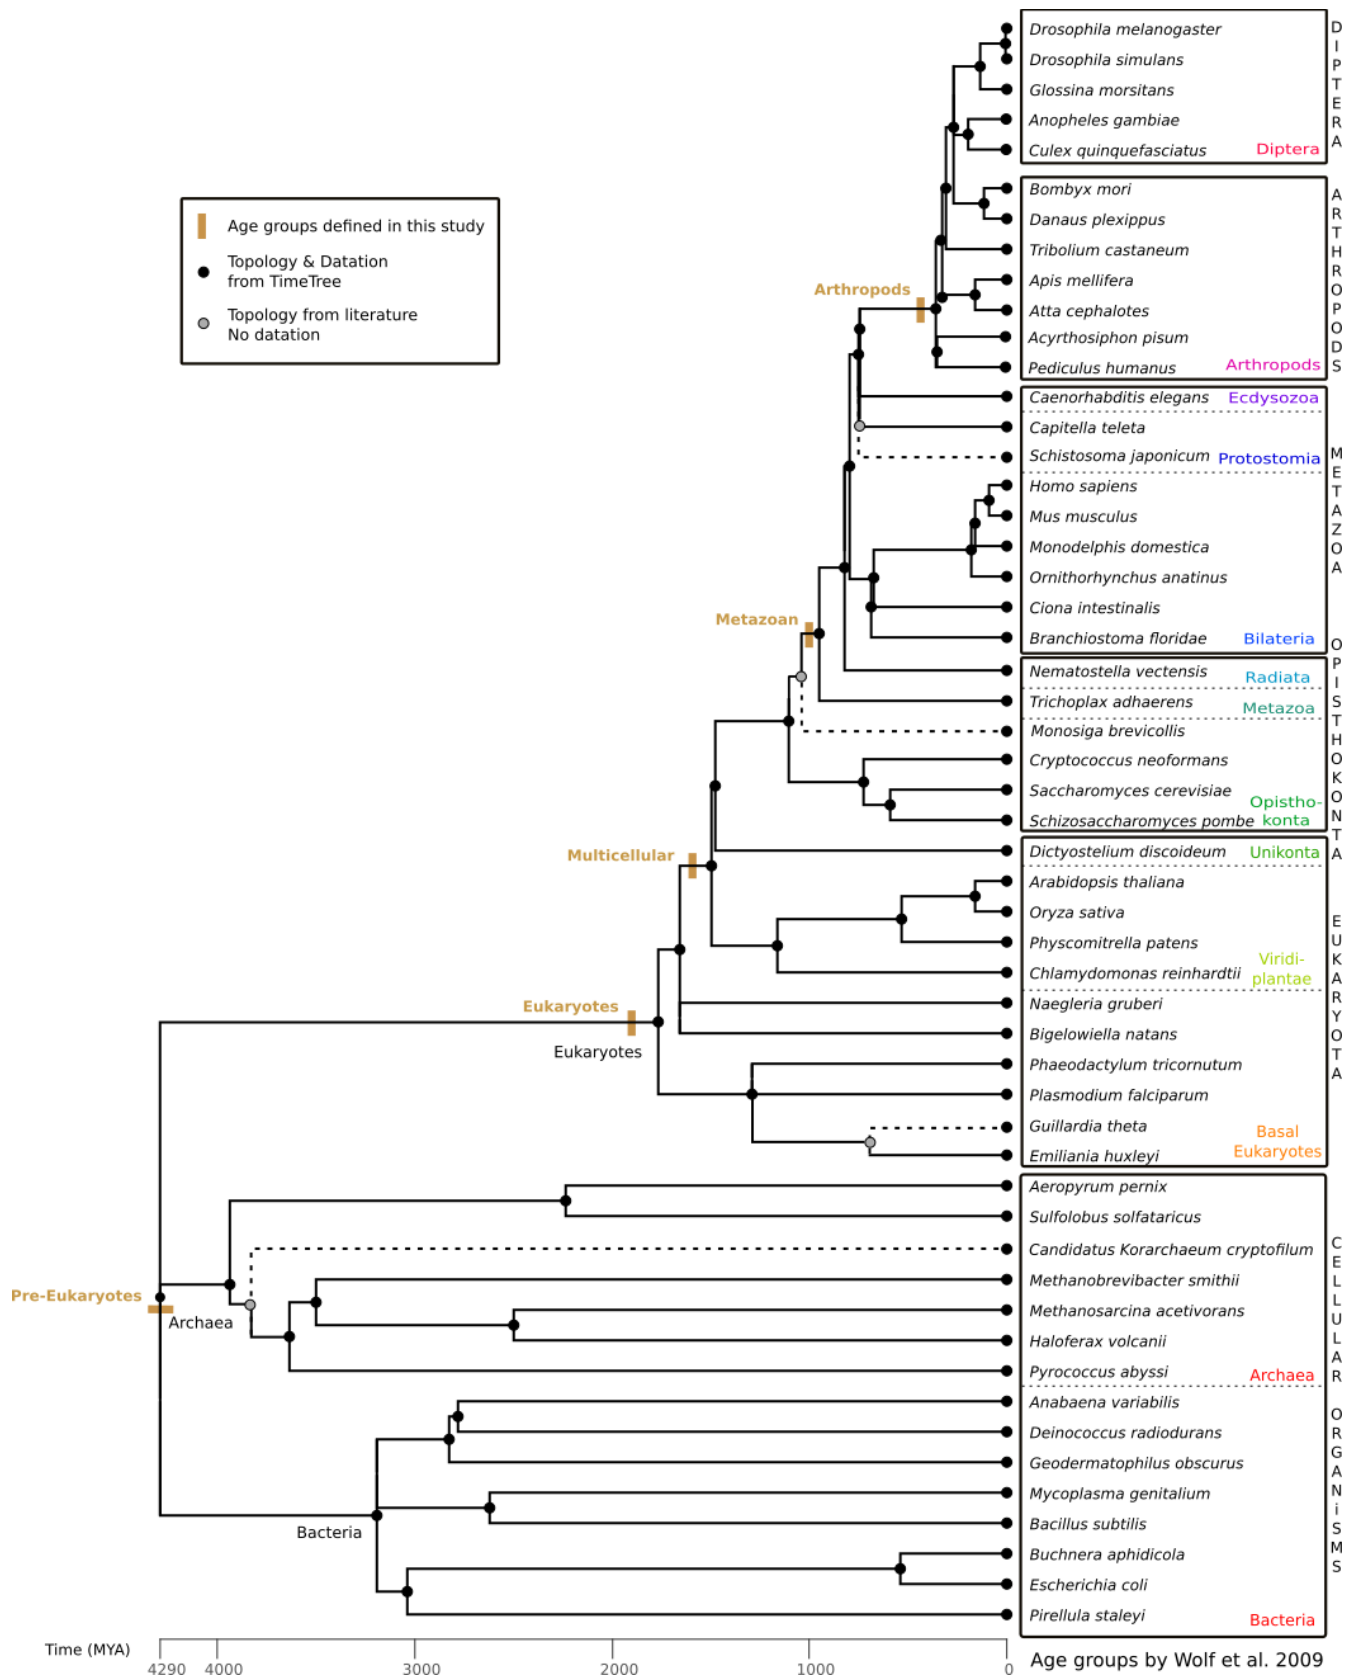

**Supplementary Figure 1.** Phylogenetic species tree of the 53 species as extracted from Timetree (<http://www.treetime.org>). Age groups defined in this study are represented as brown bars and labels on the tree. As a validation of our groups, on the right we indicate in black boxes the age groups used by (Wolf et al., 2009) to study homologs of *Drosophila melanogaster* proteins. In the boxes, colored names referred to the thirteen species groups that we defined in the main manuscript, see Fig. 1. At the bottom, time is indicated in Millions of Years Ago (MYA), with species divergence times extracted from Timetree. Species absent from TimeTree were manually added based on literature (dashed branches). For those, no dating data were available and nodes are arbitrarily placed on the timescale (grey nodes). Black nodes are dated by Timetree.

| <b>YELLOW</b>         |                       | <b>Dollo</b>     |                     |                |                   |  |
|-----------------------|-----------------------|------------------|---------------------|----------------|-------------------|--|
| <b>PAM</b>            | <b>Pre-Eukaryotes</b> | <b>Eukaryota</b> | <b>Opisthokonta</b> | <b>Metazoa</b> | <b>Arthropods</b> |  |
| <b>Pre-Euk, I+II</b>  | 3                     |                  |                     |                |                   |  |
| <b>Euk, III</b>       | 4                     | 11               |                     |                |                   |  |
| <b>Multicell, IV</b>  | 1                     | 5                |                     |                |                   |  |
| <b>Metazoa, V</b>     |                       | 5                | 2                   | 3              |                   |  |
| <b>Arthropods, VI</b> |                       | 1                |                     | 2              | 2                 |  |

  

| <b>RED</b>            |                       | <b>Dollo</b>     |                     |                |                   |  |
|-----------------------|-----------------------|------------------|---------------------|----------------|-------------------|--|
| <b>PAM</b>            | <b>Pre-Eukaryotes</b> | <b>Eukaryota</b> | <b>Opisthokonta</b> | <b>Metazoa</b> | <b>Arthropods</b> |  |
| <b>Pre-Euk, I+II</b>  | 6                     |                  |                     |                |                   |  |
| <b>Euk, III</b>       | 7                     | 20               |                     |                |                   |  |
| <b>Multicell, IV</b>  | 3                     | 9                |                     |                |                   |  |
| <b>Metazoa, V</b>     |                       | 11               | 4                   | 9              |                   |  |
| <b>Arthropods, VI</b> |                       |                  | 1                   | 5              | 8                 |  |

  

| <b>GREEN</b>          |                       | <b>Dollo</b>     |                     |                |                   |  |
|-----------------------|-----------------------|------------------|---------------------|----------------|-------------------|--|
| <b>PAM</b>            | <b>Pre-Eukaryotes</b> | <b>Eukaryota</b> | <b>Opisthokonta</b> | <b>Metazoa</b> | <b>Arthropods</b> |  |
| <b>Pre-Euk, I+II</b>  | 1                     |                  |                     |                |                   |  |
| <b>Euk, III</b>       | 1                     | 3                |                     |                |                   |  |
| <b>Multicell, IV</b>  |                       | 2                |                     |                |                   |  |
| <b>Metazoa, V</b>     |                       | 6                | 1                   |                |                   |  |
| <b>Arthropods, VI</b> |                       | 1                | 1                   | 2              | 7                 |  |

**Supplementary Table 2.** Overlap between clustering by Partitioning Around Medoids (PAM) and the Dolly parsimony method for three chromatin types, respectively YELLOW, RED, and GREEN. Numbers indicate the number of shared chromatin-associated proteins, empty cells signal zero shared proteins. See also Figure 3 and 5B in the main text, and Supplementary Table 3.

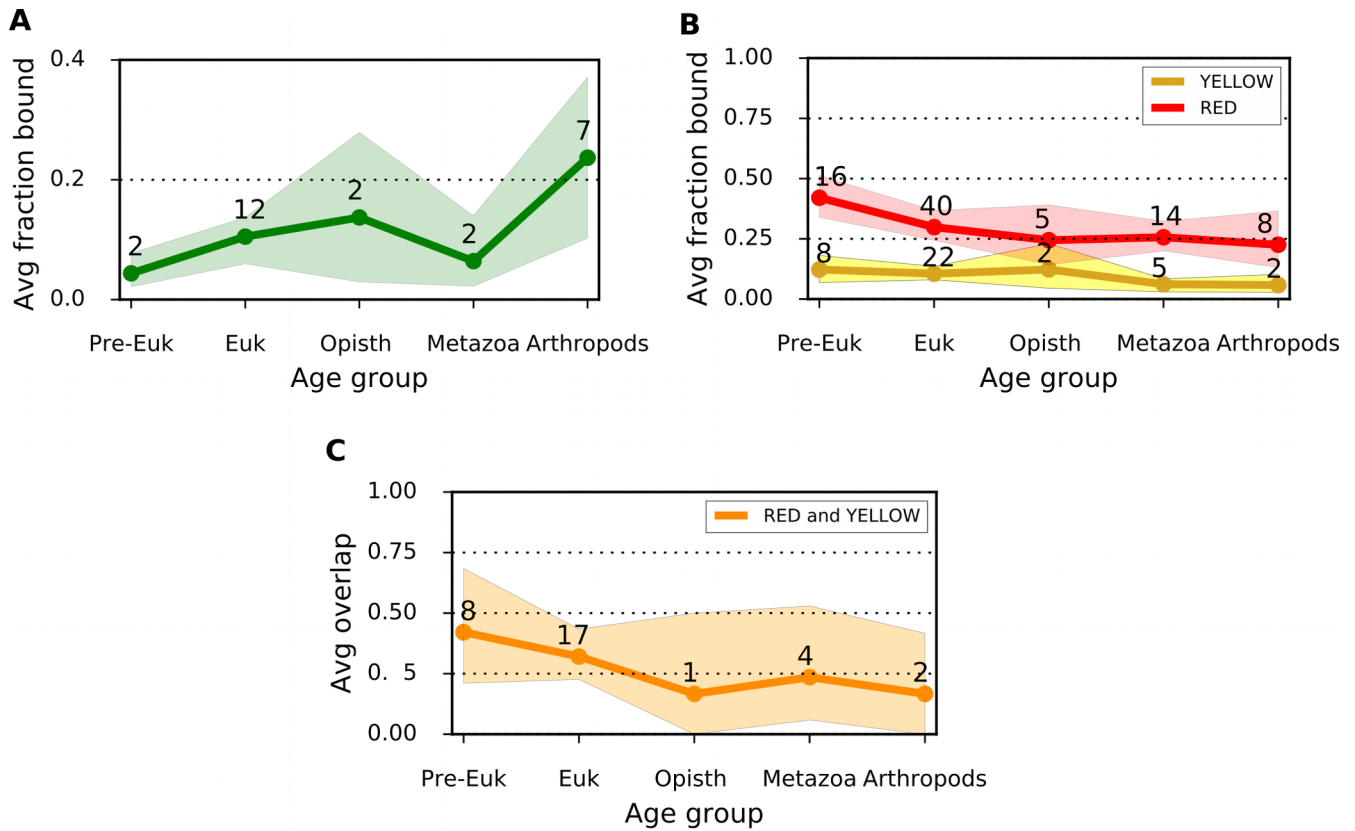

**Supplementary Figure 2.** Average fraction of genome bound by proteins over evolutionary age groups. The evolutionary age is determined by Dollo parsimony. In contrast in Fig. 3, we use Partitioning Around Medoids. (A) GREEN fraction bound. (B) RED and YELLOW fraction bound. (C) Average overlap between RED and YELLOW. See Methods and Fig. 3 in the main text for details.

| DB <sup>1</sup> | A <sup>2</sup> | N <sup>3</sup> | O <sup>4</sup> | U <sup>5</sup> | AVGi <sup>6</sup> | AVGb <sup>7</sup> | Mann-Whitney Test         |
|-----------------|----------------|----------------|----------------|----------------|-------------------|-------------------|---------------------------|
| Panther7        | W              | 38             | E*             | -              | 822.0             | 670.3             | U = 6.6e+05 (p = 0.0741)  |
| Multiparanoid   | W              | 12             | E***/O*        | Dm*            | 854.8             | 781.7             | U = 6.3e+05 (p = 0.0161)  |
| Jaccard         | W              | 12             | E***           | Dm*            | 1145.3            | 1015.9            | U = 6.3e+05 (p = 0.0109)  |
| Lens            | W              | 12             | E***           | C*/Dm*         | 1145.3            | 1015.9            | U = 6.3e+05 (p = 0.0109)  |
| OthoMCL         | W              | 12             | E*/O*          | -              | 630.9             | 622.7             | U = 6.7e+05 (p = 0.129)   |
| Panther7        | D              | 38             | E*             | Di**           | 1329.4            | 1114.2            | U = 6.2e+05 (p = 0.00757) |
| Multiparanoid   | D              | 12             | E***           | C*/Dm**        | 1018.4            | 937.5             | U = 6.3e+05 (p = 0.0111)  |
| Jaccard         | D              | 12             | E***           | Dm***          | 1316.7            | 1154.8            | U = 6.1e+05 (p = 0.00341) |
| Lens            | D              | 12             | E***           | C*/Dm***       | 1155.6            | 1076.8            | U = 6.2e+05 (p = 0.00596) |
| OthoMCL         | D              | 12             | E***           | C*/Dm*         | 880.7             | 817.9             | U = 6.4e+05 (p = 0.0191)  |

**Supplementary Table 3.** Age enrichment tests for *D. melanogaster* CAPs using different algorithms. The column headings indicate the following, from left to right. DB: The database is DROME\_PPODv4, clustered with the corresponding method. A: The algorithm used for enrichment tests, Wagner (W) and Dollo (D). N: Number of species in the species tree. O: overrepresented age groups, Eukaryota (E) and Opisthokonta (O). U: under-represented age groups, *D. melanogaster* (Dm), Cellular organism (C), and Diptera (Di). AVGi: average age input set. AVGb: average age background set. Fisher's exact test was used to calculate the significance of the differences for each age group: \*P < 0.05; \*\*P < 0.01; \*\*\*P < 0.001.

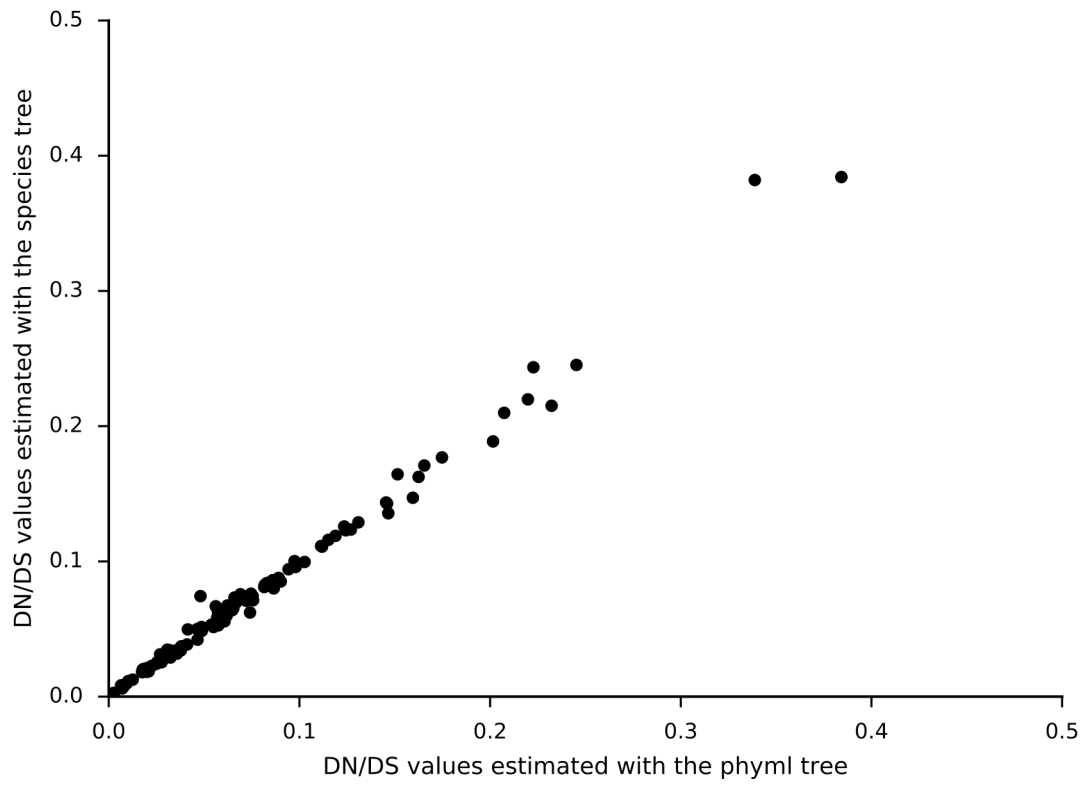

**Supplementary Figure 3.** Scatter plot of chromatin protein dN/dS ratios obtained using a gene tree topology (PhyML) and the Species tree topology (Timetree).

| Foreground branch | Likelihood |          | 2DL   | Degrees of freedom | p-value                 |
|-------------------|------------|----------|-------|--------------------|-------------------------|
|                   | Null Model | Model A  |       |                    |                         |
| 1                 | -5180.81   | -5174.19 | 13.24 | 1                  | 4.91 . 10 <sup>-3</sup> |
| 2                 | -5181.25   | -5181.63 | -0.76 | 1                  | 1                       |
| 3                 | -5178.25   | -5175.12 | 6.26  | 1                  | 0.22                    |
| 4                 | -5180.81   | -5174.19 | 13.24 | 1                  | 4.91 . 10 <sup>-3</sup> |
| 5                 | -5180.21   | -5167.94 | 24.54 | 1                  | 1.31 . 10 <sup>-5</sup> |
| 6                 | -5181.38   | -5177.30 | 8.16  | 1                  | 0.07                    |
| 7                 | -5180.17   | -5172.50 | 15.34 | 1                  | 1.62 . 10 <sup>-3</sup> |
| 8                 | -5181.47   | -5181.63 | -0.32 | 1                  | 1                       |
| 9                 | -5181.63   | -5181.63 | 0.00  | 1                  | 1                       |
| 10                | -5180.24   | -5162.70 | 35.08 | 1                  | 5.68 . 10 <sup>-8</sup> |
| 11                | -5176.93   | -5174.40 | 5.06  | 1                  | 0.44                    |
| 12                | -5178.42   | -5173.55 | 9.74  | 1                  | 0.032                   |
| 13                | -5181.63   | -5181.63 | 0.00  | 1                  | 1                       |
| 14                | -5181.63   | -5181.63 | 0.00  | 1                  | 1                       |
| 15                | -5181.41   | -5181.60 | -0.38 | 1                  | 1                       |
| 16                | -5181.63   | -5181.63 | 0.00  | 1                  | 1                       |
| 17                | -5180.50   | -5181.47 | -1.94 | 1                  | 1                       |
| 18                | -5181.63   | -5181.63 | 0.00  | 1                  | 1                       |

**Supplementary Table 4.** Summary of positive selection tests under the free-ratio model and branch-site model.

Foreground branch numbers refer to a top-to-bottom and left-to-right numbering of the branches of the tree in Figure 6A. The red font indicates significant selection tests. P-values are adjusted for multiple testing with the Bonferroni correction.



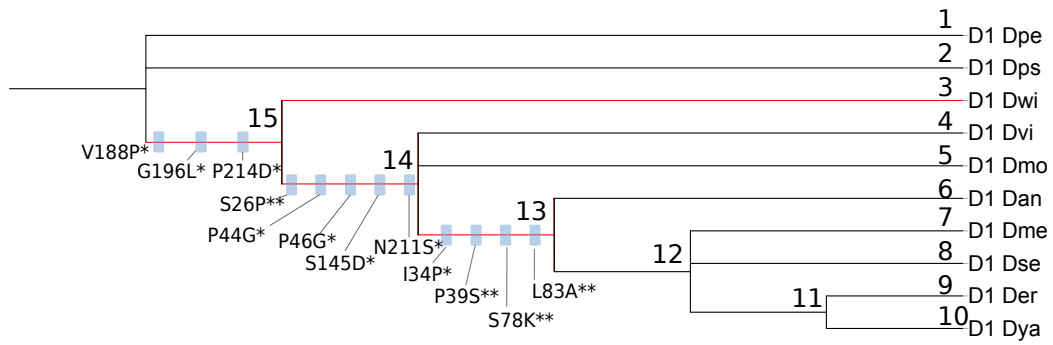

**Supplementary Figure 4.** Gene tree of D1 constructed with Phylml (with arbitrary branch lengths). The four branches with positive selection events are highlighted in red ( $p < 0.01$ , Bonferroni correction). On branches with more than one positively selected site, blue boxes indicate the amino acid substitution under positive selection, with the significance given as posterior probability of  $dN/dS > 1$  (\* for  $Pr > 0.95$ , \*\* for  $Pr > 0.99$ ). Species are indicated by 3 letter abbreviations, see Figure 6A in the main text.

| Foreground branch | Likelihood |          | 2DL   | Degrees of freedom | p-value              |
|-------------------|------------|----------|-------|--------------------|----------------------|
|                   | Null Model | Model A  |       |                    |                      |
| 1                 | -5198.60   | -5198.60 | 0.00  | 1                  | 1                    |
| 2                 | -5198.60   | -5198.60 | 0.00  | 1                  | 1                    |
| 3                 | -5195.26   | -5188.23 | 14.06 | 1                  | $2.65 \cdot 10^{-3}$ |
| 4                 | -5194.61   | -5192.83 | 3.56  | 1                  | 0.88                 |
| 5                 | -5198.53   | -5198.04 | 0.98  | 1                  | 1                    |
| 6                 | -5192.72   | -5190.66 | 4.12  | 1                  | 0.63                 |
| 7                 | -5198.49   | -5198.49 | 0.00  | 1                  | 1                    |
| 8                 | -5198.60   | -5198.60 | 0.00  | 1                  | 1                    |
| 9                 | -5198.12   | -5198.12 | 0.00  | 1                  | 1                    |
| 10                | -5198.60   | -5181.63 | 0.00  | 1                  | 1                    |
| 11                | -5198.60   | -5198.60 | 0.00  | 1                  | 1                    |
| 12                | -5196.71   | -5194.95 | 3.52  | 1                  | 0.91                 |
| 13                | -5194.00   | -5184.47 | 19.06 | 1                  | $1.91 \cdot 10^{-4}$ |
| 14                | -5193.77   | -5187.46 | 12.62 | 1                  | $5.74 \cdot 10^{-3}$ |
| 15                | -5195.54   | -5188.97 | 13.14 | 1                  | $4.36 \cdot 10^{-3}$ |

**Supplementary Table 5.** Summary of positive selection tests using the gene tree topology of Supplementary Figure 4. Foreground branch numbers refer to branches of the tree. The red font indicates significant selection tests. P-values are adjusted for multiple testing with the Bonferroni correction.
